# Supplementary material
Source: PubMed Central journal article supplement (PMC4551201)
Supplement: AEM.01102-15_zam999116384so1.pdf [file AEM.01102-15_zam999116384so1.pdf]

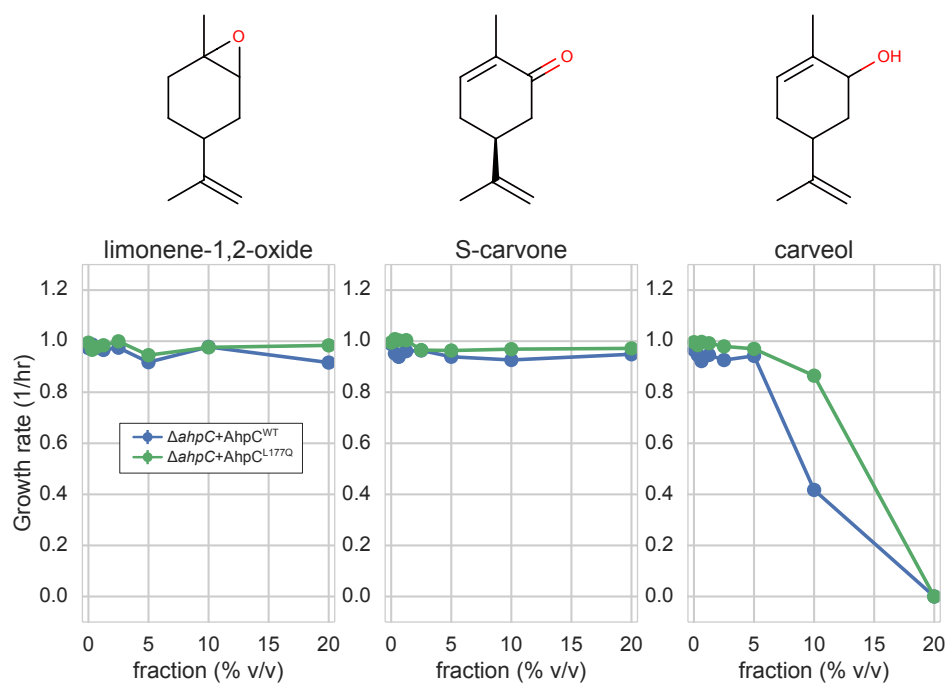

Supplementary Figure S1. Effect of other oxidized forms of limonene on growth. Non-oxidized, anaerobically stored limonene was mixed with limonene-1,2-oxide, S-carvone, or carveol, and this mixture was added at 1% v/v to the growth medium. Limonene-1,2-oxide and carveol were purchased as mixtures of isomers.

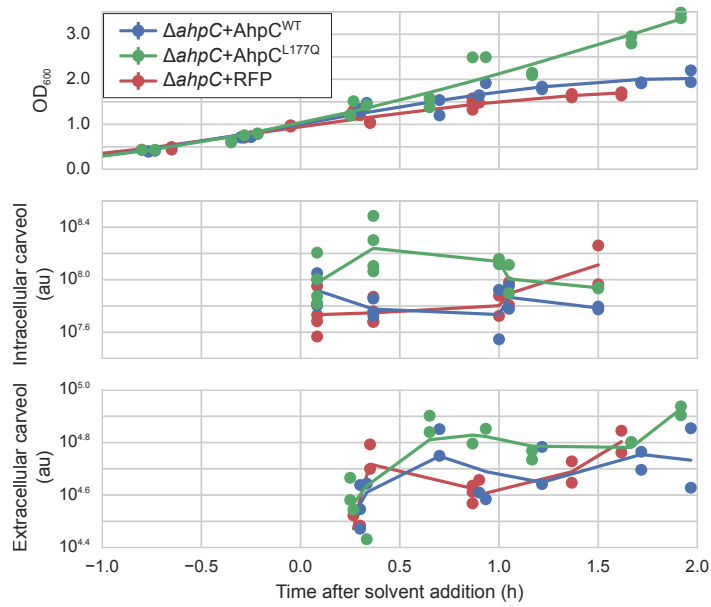

Supplementary Figure S2. Kinetics of carveol accumulation upon limonene addition to growing cultures. 1% v/v of partially oxidized limonene was added at  $t=0$ . Four independent biological replicates (from two different days) are shown together. Lines are spline fits.

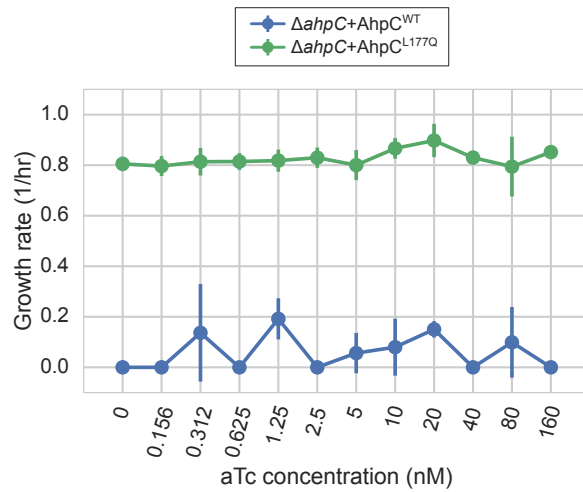

Supplementary Figure S3: Growth rate as a function of inducer concentration. 2% v/v of partially oxidized limonene with an intermediate level of toxicity was used.

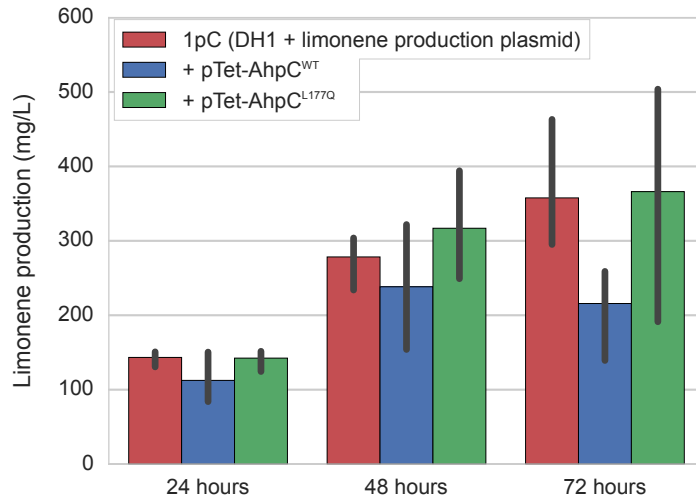

Supplementary Figure S4. Production of limonene by engineered *E. coli*. Strain 1pC from Alonso-Gutierrez et.al (1) was transformed with no plasmid (red), or plasmids expressing AhpC<sup>WT</sup> (blue) or AhpC<sup>L177Q</sup> (green). Following protocols identical to previous work (1), cells were grown in EZRich media with 10 g/L glucose. Limonene was captured by a dodecane overlay and quantified by GC-MS. See Supplementary Methods below for additional details.

|         | Name         | Description                                                                     |
|---------|--------------|---------------------------------------------------------------------------------|
| Plasmid | pVC5006      | pTet- <i>AhpC</i> <sup>L177Q</sup>                                              |
| Plasmid | pVC5005      | pTet- <i>AhpC</i> <sup>WT</sup>                                                 |
| Plasmid | pBbS2k-RFP   | pTet- <i>RFP</i>                                                                |
| Plasmid | J PUB_004931 | pBbA5c-MTSA-T1f-MBI(f)-T1002-Ptrc-trGPPS(co)-LS (limonene biosynthesis pathway) |
|         |              |                                                                                 |
| Strain  | JBx_038308   | FM003. Spontaneous mutant evolved from KEIO <i>ΔdmsD</i>                        |
| Strain  | JBx_038290   | BW25113+pVC5006                                                                 |
| Strain  | JBx_038289   | BW25113+pVC5005                                                                 |
| Strain  | JBx_038288   | BW25113+pBbS2k-RFP                                                              |
| Strain  | JBx_038293   | <i>ΔahpC</i> +pVC5006                                                           |
| Strain  | JBx_038292   | <i>ΔahpC</i> +pVC5005                                                           |
| Strain  | JBx_038291   | <i>ΔahpC</i> +pBbS2k-RFP                                                        |
| Strain  | JBx_038299   | <i>ΔacrB</i> +pVC5006                                                           |
| Strain  | JBx_038298   | <i>ΔacrB</i> +pVC5005                                                           |
| Strain  | JBx_038297   | <i>ΔacrB</i> +pBbS2k-RFP                                                        |
| Strain  | JBx_038296   | <i>ΔacrA</i> +pVC5006                                                           |
| Strain  | JBx_038295   | <i>ΔacrA</i> +pVC5005                                                           |
| Strain  | JBx_038294   | <i>ΔacrA</i> +pBbS2k-RFP                                                        |

Supplementary Table S1. Plasmids and strains used in this work. pTet: tetracycline inducible promoter (2). BW25113 and all single-gene knockout strains are from the KEIO collection (3) with the kanamycin resistance cassette removed as described in the reference.

## Supplementary Methods

Production of limonene was done using the plasmid and protocol used for strain 1pC as previously described (1). Briefly, *E. coli* DH1 was transformed with the plasmid pBbA5c-MTSA-T1f-MBI(f)-T1002-Ptrc-trGPPS(co)-LS (encoding enzymes responsible for the conversion of acetyl-CoA derived from glucose into limonene) and optionally, a second low-copy plasmid containing either the wild type *ahpC* gene or *ahpC*<sup>L177Q</sup>.

*E. coli* strains harboring the limonene production plasmid were grown in tubes containing 8 mL of EZ-Rich defined medium (Teknova), supplemented with 10g/L glucose and appropriate antibiotics (chloramphenicol and kanamycin at 30 and 12.5 µg/mL, respectively). Production cultures were induced at an OD<sub>600</sub> of 0.8-1.2 with a final concentration of 25µM isopropyl β-d-1-thiogalactopyranoside (IPTG) and 50nM anhydrous tetracycline (aTc), and allowed to continue growth at 30C. A dodecane layer (10% v/v) was added to the culture upon induction to trap limonene, and 10 µL of the organic phase was sampled and analyzed using gas-chromatography mass-spectrometry (GC/MS) at 24, 48, and 72 hours after induction.

## References

1. **Alonso-Gutierrez J, Chan R, Batth TS, Adams PD, Keasling JD, Petzold CJ, Lee TS.** 2013. Metabolic engineering of *Escherichia coli* for limonene and perillyl alcohol production. *Metabolic Engineering* **19**:33–41.
2. **Lee TS, Krupa RA, Zhang F, Hajimorad M, Holtz WJ, Prasad N, Lee SK, Keasling JD.** 2011. BglBrick vectors and datasheets: A synthetic biology platform for gene expression. *Journal of Biological Engineering* **5**:12.
3. **Baba T, Ara T, Hasegawa M, Takai Y, Okumura Y, Baba M, Datsenko KA, Tomita M, Wanner BL, Mori H.** 2006. Construction of *Escherichia coli* K-12 in-frame, single-gene knockout mutants: the Keio collection. *Mol Syst Biol* **2**:2006.0008.
